# Supplementary material for: Predicting structure-targeted food bioactive compounds for middle-aged and elderly Asians with myocardial infarction: insights from genetic variations and bioinformatics-integrated deep learning analysis
Source: Royal Society of Chemistry journal article supplement (doi:10.1039/d4fo00591k), 2024-01-01

## Supplementary figures

Figure S1. Evaluation of predictive accuracy and residual analysis for pIC<sub>50</sub> values of *ADCY8*, *DDC*, and *PPP2R5C* with interacting ligands using a random forest regressor model

Figure S2. Applicability domain analysis of interacting ligands using principal component analysis (PCA).

Figure S3. Interactive Venn diagrams depicting the distribution and overlap of NCs across various food sources

Figure S4. Dotted vertical histogram of average molecular docking scores for nine target proteins and comparison of metabolic characteristics and bioactivity of natural compounds in docking with DDC.

Figure S5. pIC<sub>50</sub> distribution across activity levels.

Figure S6. Maximum common substructures (MCS) across activity levels, segregated based on their bioactivity levels.

Figure S1

A

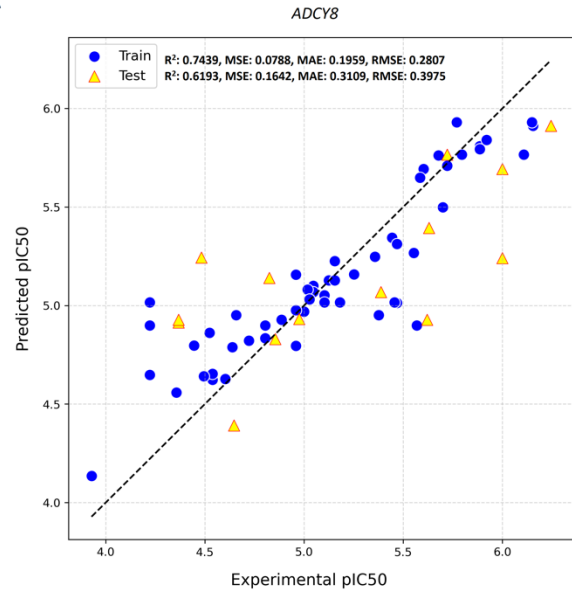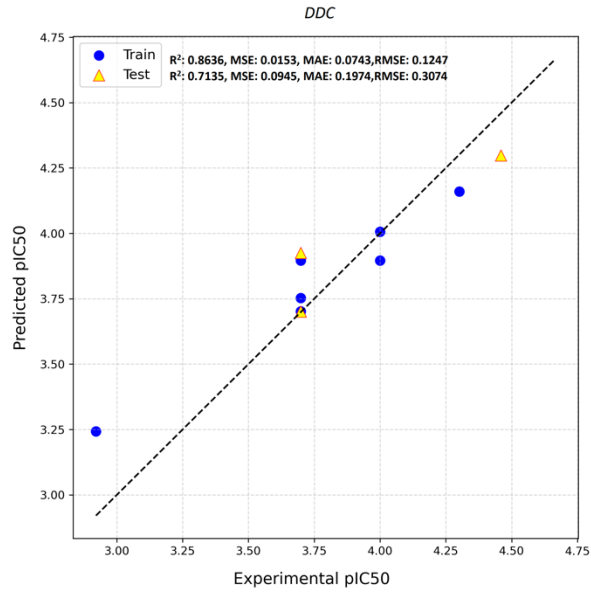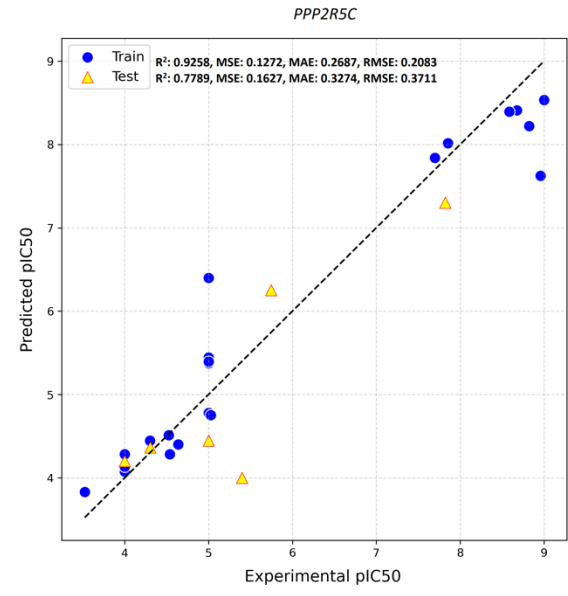

B

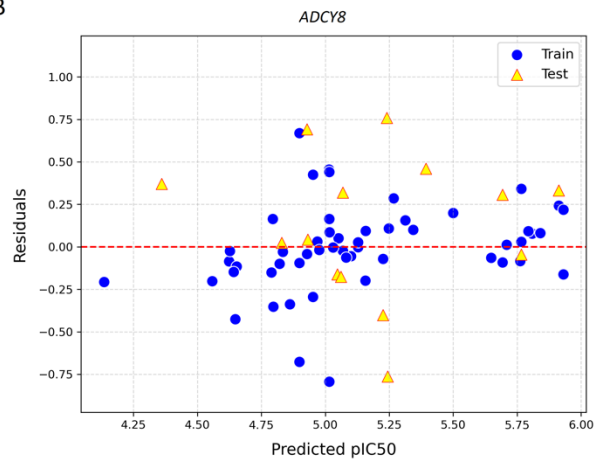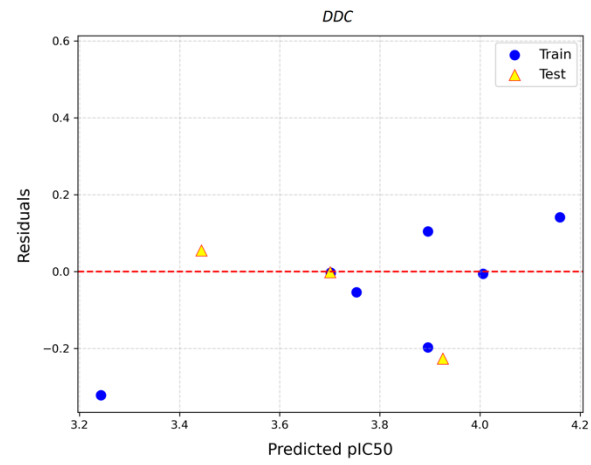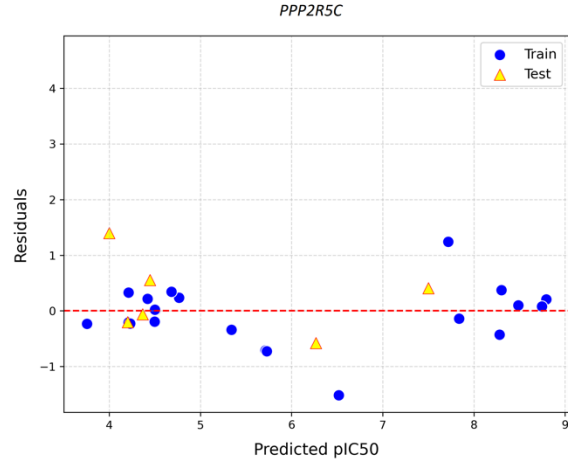

Figure S2

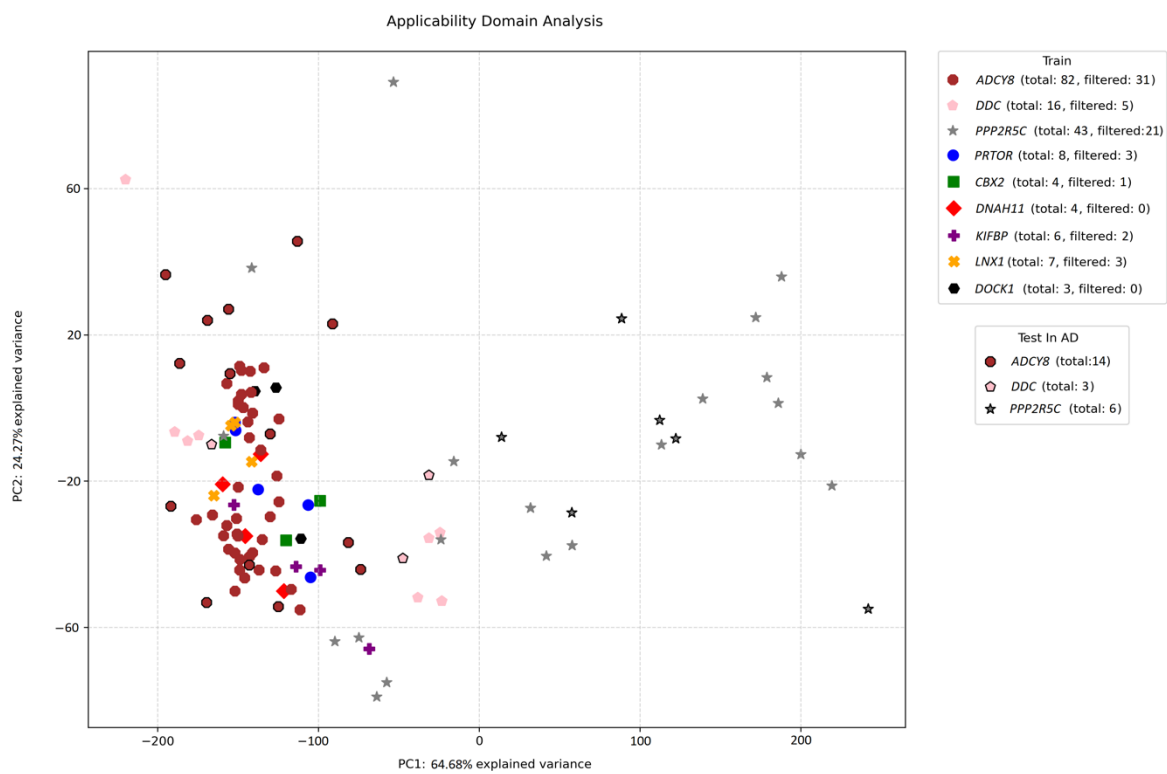

Figure S3

**A**

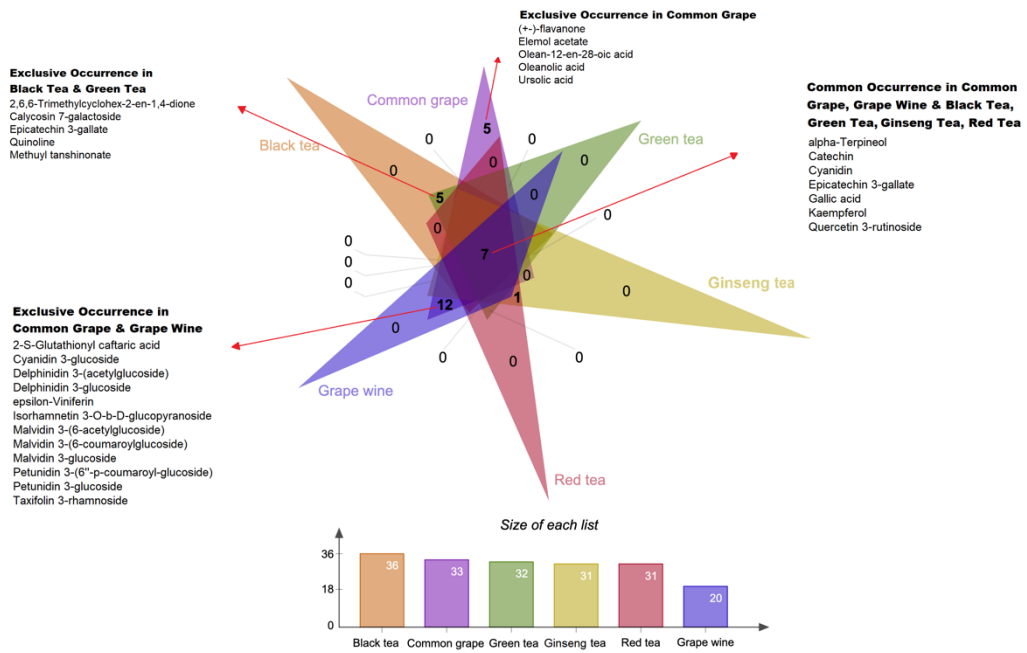

**B**

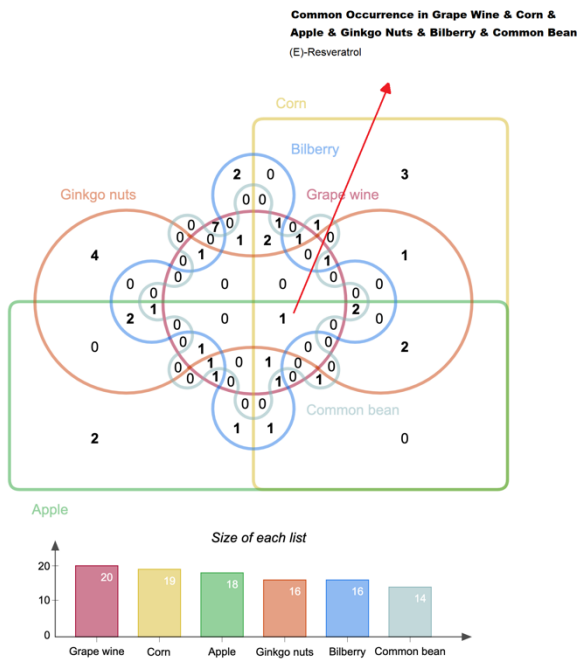

**C**

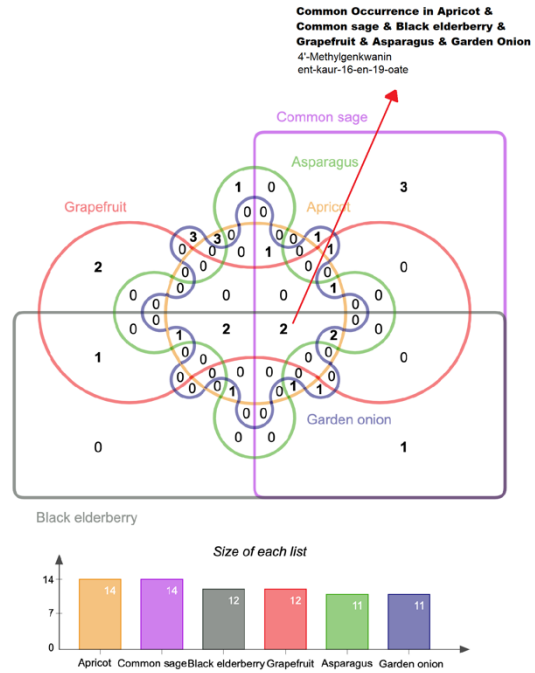

Figure S4

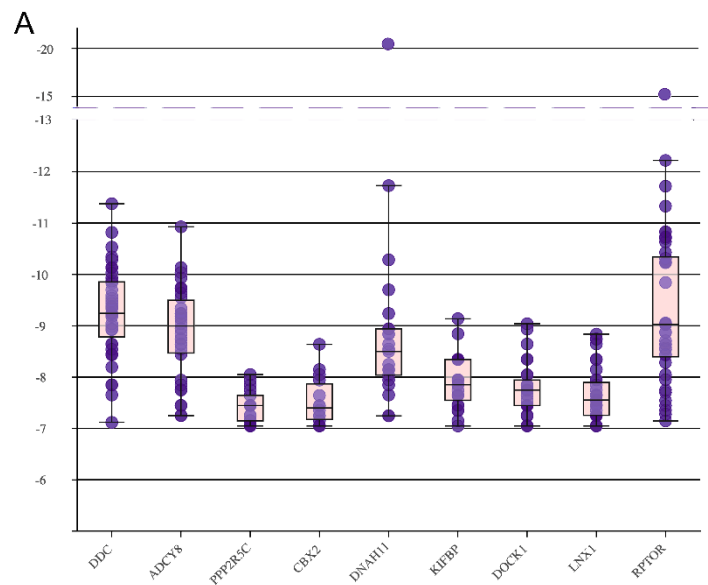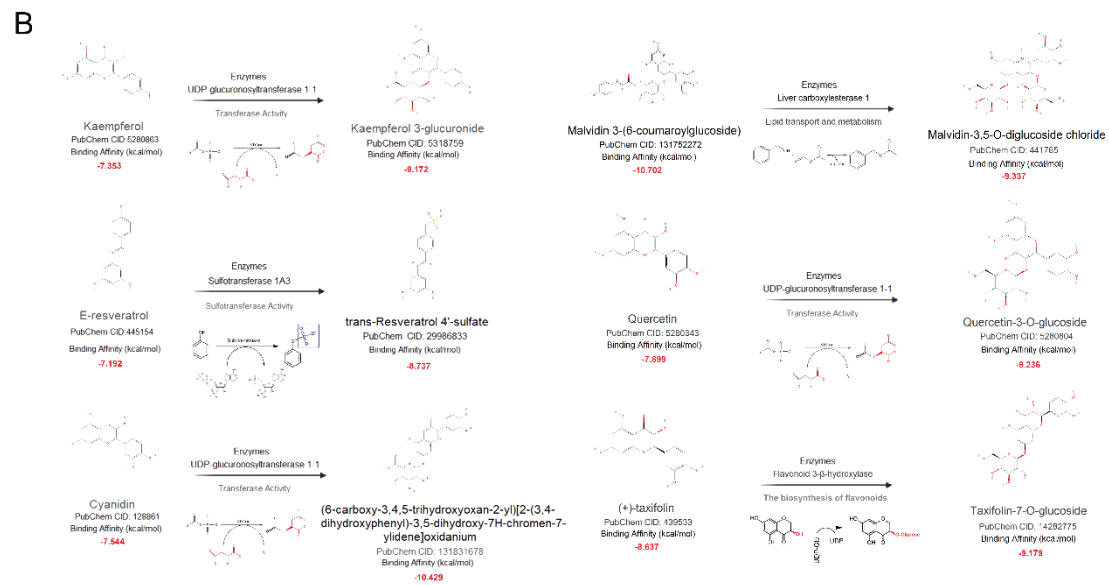

Figure S5

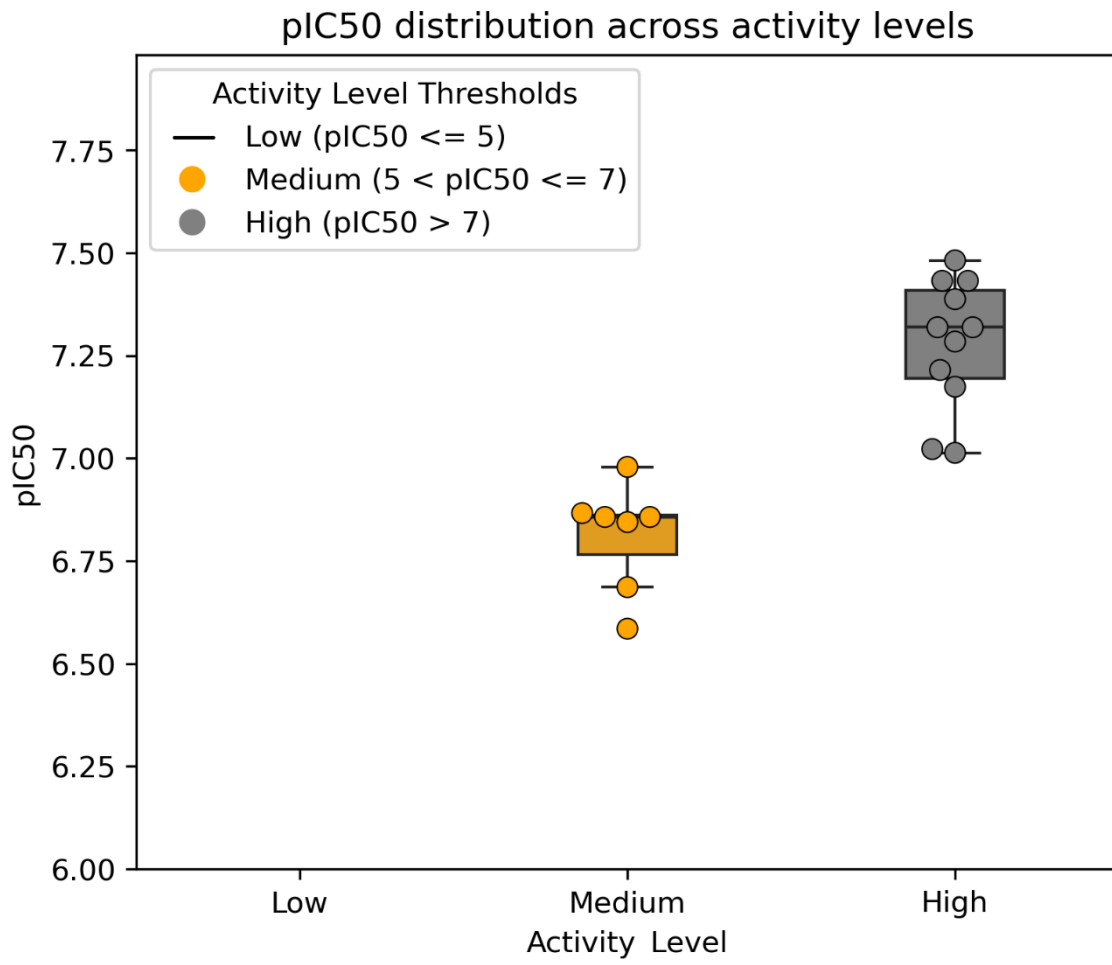

Figure S6

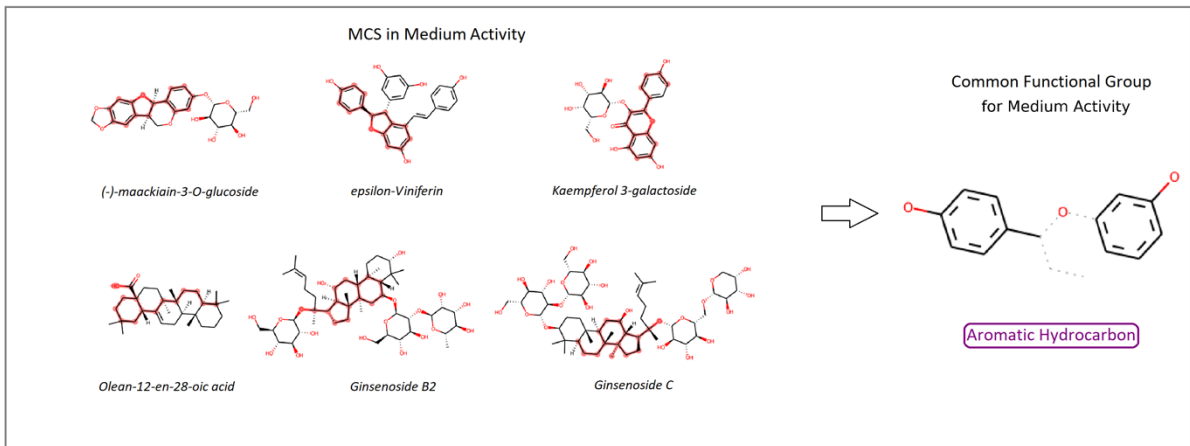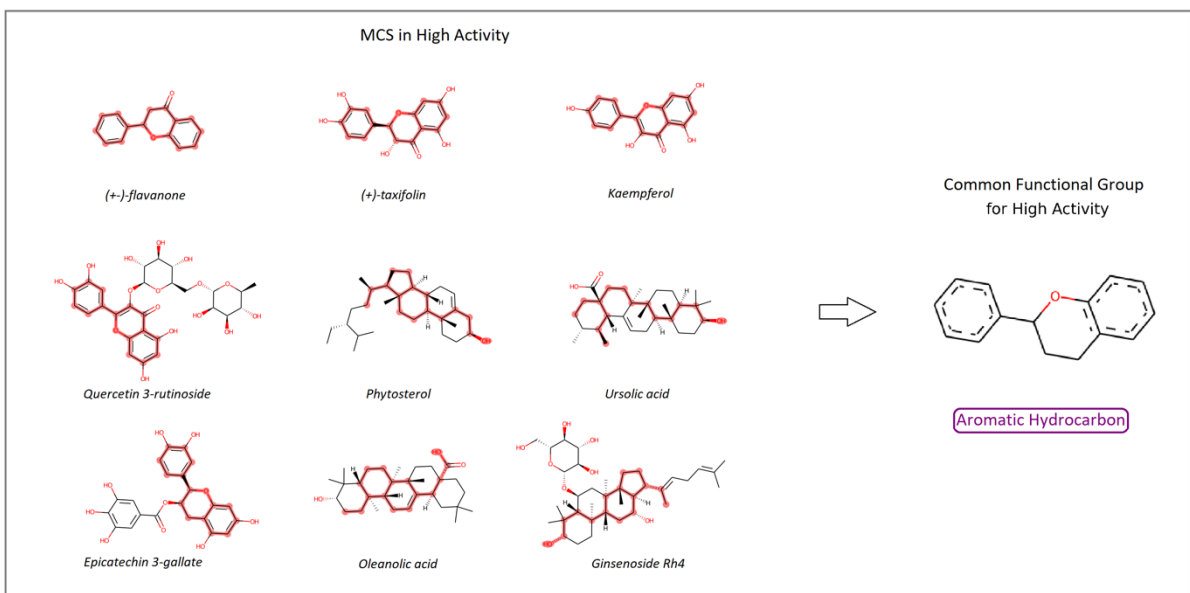

Supplement: d4fo00591k2.pdf [file d4fo00591k2.pdf]
