# Supplementary material for: Predicting structure-targeted food bioactive compounds for middle-aged and elderly Asians with myocardial infarction: insights from genetic variations and bioinformatics-integrated deep learning analysis
Source: Royal Society of Chemistry journal article supplement (doi:10.1039/d4fo00591k), 2024-01-01
Supplement: d4fo00591k1.xlsx [file d4fo00591k1.xlsx]

## Sheet: sheet1
Compound	Molecular Structure	Smiles	Wild-Type_Docking Score_Binding Energy(kcal/mol)	Mutant_Docking Score_Binding Energy(kcal/mol)
Ginsenoside B2		CC(C)=CCCC(C)(OC1OC(CO)C(O)C(O)C1O)C1CCC2(C)C1C(O)CC1C3(C)CCC(O)C(C)(C)C3C(OC3OC(CO)C(O)C(O)C3OC3OC(C)C(O)C(O)C3O)CC12C	-9.68666	-10.2874
Ginsenoside C		CC(C)=CCCC(C)(O)C1CCC2(C)C1C(O)CC1C3(C)CCC(O)C(C)(C)C3C(OC3OC(CO)C(O)C(O)C3OC3OC(C)C(O)C(O)C3O)CC12C	-9.83461	-10.2847
Ginsenoside F4		CC(C)=CC/C=C(\C)C1CCC2(C)C1C(O)CC1C3(C)CCC(O)C(C)(C)C3C(OC3OC(CO)C(O)C(O)C3OC3OC(C)C(O)C(O)C3O)CC12C	-9.16105	-9.74895
Ginsenoside A2		CC(C)=CCCC(C)(OC1OC(CO)C(O)C(O)C1O)C1CCC2(C)C1C(O)CC1C3(C)CCC(O)C(C)(C)C3C(OC3OC(CO)C(O)C(O)C3O)CC12C	-9.08229	-9.68666
Ginsenoside Rh7		CC(C)=CCCC(C)(OC1OC(CO)C(O)C(O)C1O)C1CCC2(C)C1C(O)CC1C3(C)CCC(O)C(C)(C)C3=CC(O)C12C	-9.14699	-9.59206
Eleutheroside M		CC1OC(OC2C(CO)OC(OCC3OC(OC(=O)C45CCC(C)(C)CC4C4=CCC6C7(C)CCC(OC8OCC(O)C(O)C8OC8OC(C)C(O)C(O)C8O)C(C)(C)C7CCC6(C)C4(C)CC5)C(O)C(O)C3O)C(O)C2O)C(O)C(O)C1O	-9.10659	-9.54044
Oleanolic acid		CC1(C)CC[C@]2(C(=O)O)CC[C@]3(C)C(=CC[C@@H]4[C@@]5(C)CC[C@H](O)C(C)(C)[C@@H]5CC[C@]43C)[C@@H]2C1	-9.14395	-9.46192
Hederagenin		C[C@H]1[C@H](C)CC[C@]2(C(=O)O)CC[C@]3(C)C(=CC[C@@H]4[C@@]5(C)CC[C@H](O)C(C)(C)C5CC[C@]43C)[C@H]12	-9.04457	-9.13596
Ginsenoside Rh4		CC(C)=CC/C=C(\C)C1CCC2(C)C1C(O)CC1C3(C)CCC(O)C(C)(C)C3C(OC3OC(CO)C(O)C(O)C3O)CC12C	-8.884	-8.97745
Ursolic acid		CC1(C)CCC2(C(=O)O)CCC3(C)C(=CCC4C5(C)CCCC(C)(C)C5CCC43C)C2C1	-8.70474	-8.79348
Olean-12-en-28-oic acid		CC1(C)CCC2(C(=O)O)CCC3(C)C(=CCC4C5(C)CCC(O)C(C)(CO)C5CCC43C)C2C1	-8.75141	-8.77113
Phytosterol		CC[C@H](CC[C@@H](C)[C@H]1CC[C@H]2[C@@H]3CC=C4C[C@@H](O)CC[C@]4(C)[C@H]3CC[C@]12C)C(C)C	-8.4366	-8.76685
epsilon-Viniferin		Oc1ccc(/C=C/c2cc(O)cc3c2[C@@H](c2cc(O)cc(O)c2)[C@H](c2ccc(O)cc2)O3)cc1	-8.35275	-8.67694
Malvidin 3-(6-coumaroylglucoside)		COc1cc(-c2[o+]c3cc(O)cc(O)c3cc2OC2OC(COC(=O)/C=C/c3ccc(O)cc3)C(O)C(O)C2O)cc(OC)c1O	-8.18281	-8.53832
ent-kaur-16-en-19-oate		C=C1CC23CCC4C(C)(C(=O)[O-])CCCC4(C)C2CCC1C3	-7.81897	-8.52053
Petunidin 3-(6''-p-coumaroyl-glucoside)		COc1cc(-c2[o+]c3cc(O)cc(O)c3cc2OC2O[C@H](COC(=O)/C=C/c3ccc(O)cc3)[C@@H](O)[C@H](O)[C@H]2O)cc(O)c1O	-8.00052	-8.36887
Calycosin 7-galactoside		COc1ccc(-c2coc3cc(OC4OC(CO)C(O)C(O)C4O)ccc3c2=O)cc1O	-7.90755	-8.30052
Epicatechin 3-gallate		O=C(O[C@@H]1Cc2c(O)cc(O)cc2O[C@@H]1c1ccc(O)c(O)c1)c1cc(O)c(O)c(O)c1	-7.14068	-8.11508
2-(3,4-dihydroxy-5-methoxyphenyl)-3,5,7-trihydroxy-4H-chromen-4-one		COc1cc(-c2oc3cc(O)cc(O)c3c(=O)c2O)cc(O)c1O	-8.02784	-8.0875
Quercetin 3-rutinoside		C[C@@H]1O[C@@H](OC[C@H]2O[C@@H](Oc3c(-c4ccc(O)c(O)c4)oc4cc(O)cc(O)c4c3=O)[C@H](O)[C@@H](O)[C@@H]2O)[C@H](O)[C@H](O)[C@H]1O	-7.50722	-8.04914
Malvidin 3-(6-acetylglucoside)		COc1cc(-c2[o+]c3cc(O)cc(O)c3cc2OC2OC(COC(C)=O)C(O)C(O)C2O)cc(OC)c1O	-7.04107	-7.93699
(-)-maackiain-3-O-glucoside		OC[C@H]1O[C@@H](Oc2ccc3c(c2)OC[C@H]2c4cc5c(cc4O[C@@H]32)OCO5)[C@H](O)[C@@H](O)[C@@H]1O	-7.21737	-7.80343
Taxifolin 3-rhamnoside		C[C@@H]1O[C@@H](O[C@H]2C(=O)c3c(O)cc(O)cc3O[C@@H]2c2ccc(O)c(O)c2)[C@H](O)[C@H](O)[C@H]1O	-6.62999	-7.79056
(+)-taxifolin		O=c1c(O)c(-c2ccc(O)cc2)oc2cc(O)cc(O)c12	-6.77529	-7.72557
4'-Methylgenkwanin		COc1ccc(-c2cc(=O)c3c(O)cc(OC)cc3o2)cc1	-7.66409	-7.69476
Quercetin		O=c1c(O)c(-c2ccc(O)c(O)c2)oc2cc(O)cc(O)c12	-6.78738	-7.582
2-S-Glutathionyl caftaric acid		NC(CCC(=O)NC(CSc1c(/C=C/C(=O)OC(C(=O)O)C(O)C(=O)O)ccc(O)c1O)C(=O)NCC(=O)O)C(=O)O	-7.11852	-7.56335
Delphinidin 3-(acetylglucoside)		CC(=O)OC[C@H]1O[C@@H](Oc2cc3c(O)cc(O)cc3[o+]c2-c2cc(O)c(O)c(O)c2)[C@H](O)[C@@H](O)[C@@H]1O	-7.16473	-7.39977
Kaempferol 3-galactoside		O=c1c(O[C@@H]2OC(CO)C(O)[C@H](O)C2O)c(-c2ccc(O)cc2)oc2cc(O)cc(O)c12	-7.35151	-7.36592
Salvigenin		COc1ccc(-c2cc(=O)c3c(O)c(OC)c(OC)cc3o2)cc1	-6.54175	-7.16953
Magnoflorine		COc1ccc2c(c1O)-c1c(O)c(OC)cc3c1C(C2)[N+](C)(C)CC3	-7.06134	-7.07136
Isorhamnetin 3-O-b-D-glucopyranoside		COc1cc(-c2oc3cc(O)cc(O)c3c(=O)c2OC2OC(CO)C(O)C(O)C2O)ccc1O	-6.3446	-6.98652
Delphinidin 3-glucoside		OC[C@H]1O[C@@H](Oc2cc3c(O)cc(O)cc3[o+]c2-c2cc(O)c(O)c(O)c2)[C@H](O)[C@@H](O)[C@@H]1O	-6.6564	-6.96591
Petunidin 3-glucoside		COc1cc(-c2[o+]c3cc(O)cc(O)c3cc2O[C@@H]2O[C@H](CO)[C@@H](O)[C@H](O)[C@H]2O)cc(O)c1O	-6.61277	-6.91182
Cyanidin-3-O-beta-D-glucoside		OCC1OC(Oc2cc3c(O)cc(O)cc3[o+]c2-c2ccc(O)c(O)c2)C(O)C(O)C1O	-6.58878	-6.83959
3,4',5-Trihydroxy-3',7-dimethoxyflavanone		COc1cc(O)c2c(c1)OC(c1ccc(O)c(OC)c1)C(O)C2=O	-6.71535	-6.71821
Cyanidin		Oc1cc(O)c2cc(O)c(-c3ccc(O)c(O)c3)[o+]c2c1	-6.49182	-6.62255
Malvidin 3-glucoside		COc1cc(-c2[o+]c3cc(O)cc(O)c3cc2O[C@@H]2O[C@H](CO)[C@@H](O)[C@H](O)[C@H]2O)cc(OC)c1O	-6.31678	-6.41125
7-Hydroxy-2-methylisoflavone		Cc1oc2cc(O)ccc2c(=O)c1-c1ccccc1	-6.23604	-6.26598
Kaempferol		O=C1c2c(O)cc(O)cc2O[C@H](c2ccc(O)c(O)c2)[C@H]1O	-5.91791	-6.09505
Catechin		Oc1cc(O)c2c(c1)O[C@H](c1ccc(O)c(O)c1)[C@@H](O)C2	-5.71663	-6.07213
(E)-Resveratrol		Oc1ccc(/C=C/c2cc(O)cc(O)c2)cc1	-6.5019	-5.63523
(+-)-flavanone		O=C1CC(c2ccccc2)Oc2ccccc21	-5.89054	-5.47062
2,6,6-Trimethylcyclohex-2-en-1,4-dione		CC1=CC(=O)CC(C)(C)C1=O	-5.5152	-4.88779
alpha-Terpineol		CC1=CCC(C(C)(C)O)CC1	-4.9789	-4.73531
